# Supplementary material for: Why do apprentices smoke much more than high school students? Understanding educational disparities in smoking with a Oaxaca-blinder decomposition analysis
Source: Springer Nature journal article supplement (doi:10.1186/s12889-020-09050-4), 2020-06-12
Supplement: MOESM1 [file 18078280]

Why do apprentices smoke much more than high school students? Understanding educational disparities in smoking with a Oaxaca-blinder decomposition analysis.

Supplementary materials

Table 1S - Oaxaca-Blinder decomposition of differences in daily smoking between high school students and apprentices in the 2008 sample without the variables “parental smoking”: estimates and percentage contributions. ESCAPAD survey, OFDT

|                                    | Model including all characteristics |       |               | Model excluding use of alcohol and cannabis |       |              |
|------------------------------------|-------------------------------------|-------|---------------|---------------------------------------------|-------|--------------|
|                                    | Estimate                            | Share | CI            | Estimate                                    | Share | CI           |
|                                    | Log odds                            | (%)   |               | Log odds                                    | (%)   |              |
| Total Unexplained                  | -0.14                               | 59.5  | 58.4 to 61.3  | -0.16                                       | 67.7  | 64.9 to 72.4 |
| Total Explained                    | -0.10                               | 40.5  | 38.7 to 41.6  | -0.08                                       | 32.3  | 27.6 to 35.1 |
| Age                                | 0.00                                | 1.7   | 0.6 to 2.3    | -0.01                                       | 2.2   | 1.3 to 2.8   |
| Gender (Girl)                      | 0.01                                | -4.9  | -10.2 to -1.4 | 0.00                                        | 1.6   | -2.4 to 4.0  |
| Parental occupational status       |                                     |       |               |                                             |       |              |
| Low                                | 0.00                                | 0.4   | -0.5 to 0.9   | 0.00                                        | 0.0   | 0.0 to 0.6   |
| Disadvantaged                      | 0.00                                | 0.0   | -2.0 to 1.3   | 0.00                                        | -0.1  | -2.4 to 1.2  |
| Intermediate                       | 0.00                                | 0.1   | -0.3 to 0.4   | 0.00                                        | 0.3   | -0.2 to 0.6  |
| Advantaged                         | 0.00                                | 0.4   | -1.1 to 1.4   | 0.00                                        | -0.3  | -2.1 to 0.8  |
| High                               | 0.00                                | -0.2  | -2.6 to 1.4   | 0.00                                        | -0.9  | -3.8 to 0.8  |
| Parents living together (Yes)      | 0.00                                | 1.6   | 0.5 to 2.3    | -0.01                                       | 3.4   | 2.6 to 3.9   |
| Living alone (Yes)                 | 0.00                                | 0.4   | -0.1 to 0.7   | 0.00                                        | 0.7   | 0.0 to 1.1   |
| Suicide attempt (Yes)              | 0.00                                | 1.5   | 0.6 to 2.1    | -0.01                                       | 2.5   | 1.6 to 3.1   |
| Grade repetition (Yes)             | -0.01                               | 5.9   | 1.8 to 8.6    | -0.01                                       | 3.8   | -1.4 to 6.9  |
| Cannabis in the past month (Yes)   | -0.04                               | 17.4  | 17.0 to 18.1  |                                             |       |              |
| Alcohol in the past month (Yes)    | -0.01                               | 4.1   | 3.4 to 4.5    |                                             |       |              |
| Sum of money received (continuous) | -0.03                               | 11.9  | 3.9 to 17.1   | -0.05                                       | 19.1  | 12.0 to 23.4 |

CI: confidence interval

Table 2S - Oaxaca-Blinder decomposition of differences in daily smoking between high school students and apprentices in 2008 without the variable “money received”: estimates and percentage contributions. ESCAPAD survey, OFDT

|                                  | Model including all characteristics |       |              | Model excluding use of alcohol and cannabis |       |              |
|----------------------------------|-------------------------------------|-------|--------------|---------------------------------------------|-------|--------------|
|                                  | Estimate                            | Share | CI           | Estimate                                    | Share | CI           |
|                                  | Log odds                            | (%)   |              | Log odds                                    | (%)   |              |
| Total Unexplained                | -0.16                               | 66.7  | 65.2 to 68.7 | -0.20                                       | 79.9  | 76.8 to 84.2 |
| Total Explained                  | -0.08                               | 33.3  | 31.3 to 34.8 | -0.05                                       | 20.1  | 15.8 to 23.2 |
| Age                              | 0.00                                | 1.9   | 0.8 to 2.6   | -0.01                                       | 2.7   | 1.6 to 3.4   |
| Gender (Girl)                    | 0.01                                | -2.2  | -6.2 to 0.8  | -0.01                                       | 4.0   | 1.0 to 6.2   |
| Parental occupational status     |                                     |       |              |                                             |       |              |
| Low                              | 0.00                                | 0.2   | -0.6 to 0.8  | 0.00                                        | -0.1  | -1.0 to 0.6  |
| Disadvantaged                    | 0.00                                | -0.6  | -2.7 to 1.0  | 0.00                                        | -1.1  | -3.4 to 0.6  |
| Middle                           | 0.00                                | 0.1   | -0.3 to 0.3  | 0.00                                        | 0.3   | -0.2 to 0.6  |
| Advantaged                       | 0.00                                | 0.3   | -1.2 to 1.4  | 0.00                                        | -0.2  | -1.8 to 1.0  |
| High                             | 0.00                                | -0.4  | -2.7 to 1.3  | 0.00                                        | -1.6  | -4.2 to 0.4  |
| Parents living together (Yes)    | 0.00                                | 0.4   | -1.0 to 1.4  | 0.00                                        | 1.8   | 0.6 to 2.7   |
| Living alone (Yes)               | 0.00                                | 0.2   | -0.2 to 0.6  | 0.00                                        | 0.4   | -0.3 to 0.8  |
| Suicide attempt (Yes)            | 0.00                                | 1.7   | 0.7 to 2.5   | -0.01                                       | 2.6   | 1.4 to 3.4   |
| Grade repetition (Yes)           | -0.01                               | 3.6   | -1.3 to 7.1  | 0.00                                        | 0.9   | -4.6 to 4.9  |
| Cannabis in the past month (Yes) | -0.04                               | 16.0  | 15.1 to 16.6 |                                             |       |              |
| Alcohol in the past month (Yes)  | -0.01                               | 4.0   | 3.1 to 4.7   |                                             |       |              |
| Father smokes (Yes)              | -0.01                               | 3.6   | 2.3 to 4.6   | -0.01                                       | 4.1   | 2.9 to 5.0   |
| Mother smokes (Yes)              | -0.01                               | 4.5   | 3.2 to 5.4   | -0.02                                       | 6.3   | 5.2 to 7.1   |

CI: confidence interval

Table 3S – Oaxaca-Blinder decomposition of differences in daily smoking between high school students and apprentices in the 2008, 2017-A and 2017-B samples. Sensitivity analysis with one model for each independent variable: estimates and percentage contributions. ESCAPAD survey, OFDT

|                                    | 2008 sample |       |              | 2017-A sample |       |              | 2017-B sample |       |              |
|------------------------------------|-------------|-------|--------------|---------------|-------|--------------|---------------|-------|--------------|
|                                    | Estimate    | Share | CI           | Estimate      | Share | p-value      | Estimate      | Share | CI           |
|                                    | Log odds    | (%)   |              | Log odds      | (%)   |              | Log odds      | (%)   |              |
| Age                                | -0.01       | 3.0   | 2.0 to 3.9   | 0.00          | -0.4  | -1.5 to 0.5  | 0.00          | 0.3   | -0.7 to 1.0  |
| Gender (Girl)                      | 0.00        | 2.0   | -1.1 to 4.5  | -0.02         | 10.0  | 2.4 to 14.5  | 0.00          | 1.8   | -7 to 7.4    |
| Parental occupational status       |             |       |              |               |       |              |               |       |              |
| Low                                | 0.00        | 0.5   | -0.2 to 1.2  | 0.00          | -0.8  | -3.2 to 1.0  | 0.00          | -1.1  | -3.4 to 0.6  |
| Disadvantaged                      | 0.00        | -0.8  | -2.1 to 0.5  | 0.01          | -2.8  | -8.4 to 1.0  | 0.00          | -1.2  | -4.9 to 1.6  |
| Intermediate                       | 0.00        | 0.4   | 0.0 to 0.7   | 0.00          | 0.0   | -1.0 to 0.6  | 0.00          | -0.1  | -0.7 to 0.3  |
| Advantaged                         | 0.00        | -0.4  | -1.5 to 0.7  | 0.00          | -1.1  | -6.5 to 2.5  | 0.01          | -2.7  | -8.2 to 1.2  |
| High                               | 0.00        | -0.7  | -2.2 to 0.9  | 0.01          | -2.7  | -15.9 to 4.9 | 0.00          | -1.3  | -7.7 to 3.1  |
| Parents living together (Yes)      | -0.01       | 4.7   | 3.6 to 5.7   | -0.01         | 6.0   | 2.9 to 8.1   | -0.01         | 3.8   | 1.0 to 5.8   |
| Living alone (Yes)                 | 0.00        | 0.7   | -0.1 to 1.3  | 0.00          | 0.7   | -0.6 to 1.7  | 0.00          | 1.3   | -0.7 to 2.8  |
| Suicide attempt (Yes)              | -0.01       | 2.3   | 1.2 to 3.2   | 0.00          | 0.1   | -0.5 to 0.5  | 0.00          | 1.5   | -0.1 to 2.6  |
| Grade repetition (Yes)             | -0.02       | 6.9   | 3.0 to 10    | 0.00          | 0.9   | -9.3 to 7.1  | 0.00          | 0.1   | -9.9 to 6.3  |
| Cannabis in the past month (Yes)   | -0.05       | 20.6  | 19.3 to 21.7 | -0.05         | 23.5  | 20.7 to 25.4 | -0.04         | 18.0  | 15.0 to 20.1 |
| Alcohol in the past month (Yes)    | -0.02       | 7.3   | 6.0 to 8.4   | -0.02         | 10.8  | 7.6 to 12.9  | -0.04         | 14.3  | 11.4 to 16.3 |
| Father smokes (Yes)                | -0.02       | 6.8   | 5.6 to 7.9   |               |       |              | -0.02         | 8.5   | 4.8 to 10.9  |
| Mother smokes (Yes)                | -0.02       | 8.5   | 7.2 to 9.6   |               |       |              | -0.03         | 11.5  | 8.0 to 13.8  |
| Sum of money received (continuous) | -0.06       | 22.9  | 17.7 to 26.4 | -0.04         | 20.3  | 0.3 to 27.6  |               |       |              |

CI: confidence interval
